# Supplementary material for: In vitrobioaccessibility and speciation changes of selenium inPleurotus eryngiiduring the growing stage
Source: Royal Society of Chemistry journal article supplement (doi:10.1039/c8fo00566d), 2018-01-01

## Supplementary information

**Fig. S1** Scheme for successive extraction procedure of Se-containing proteins.

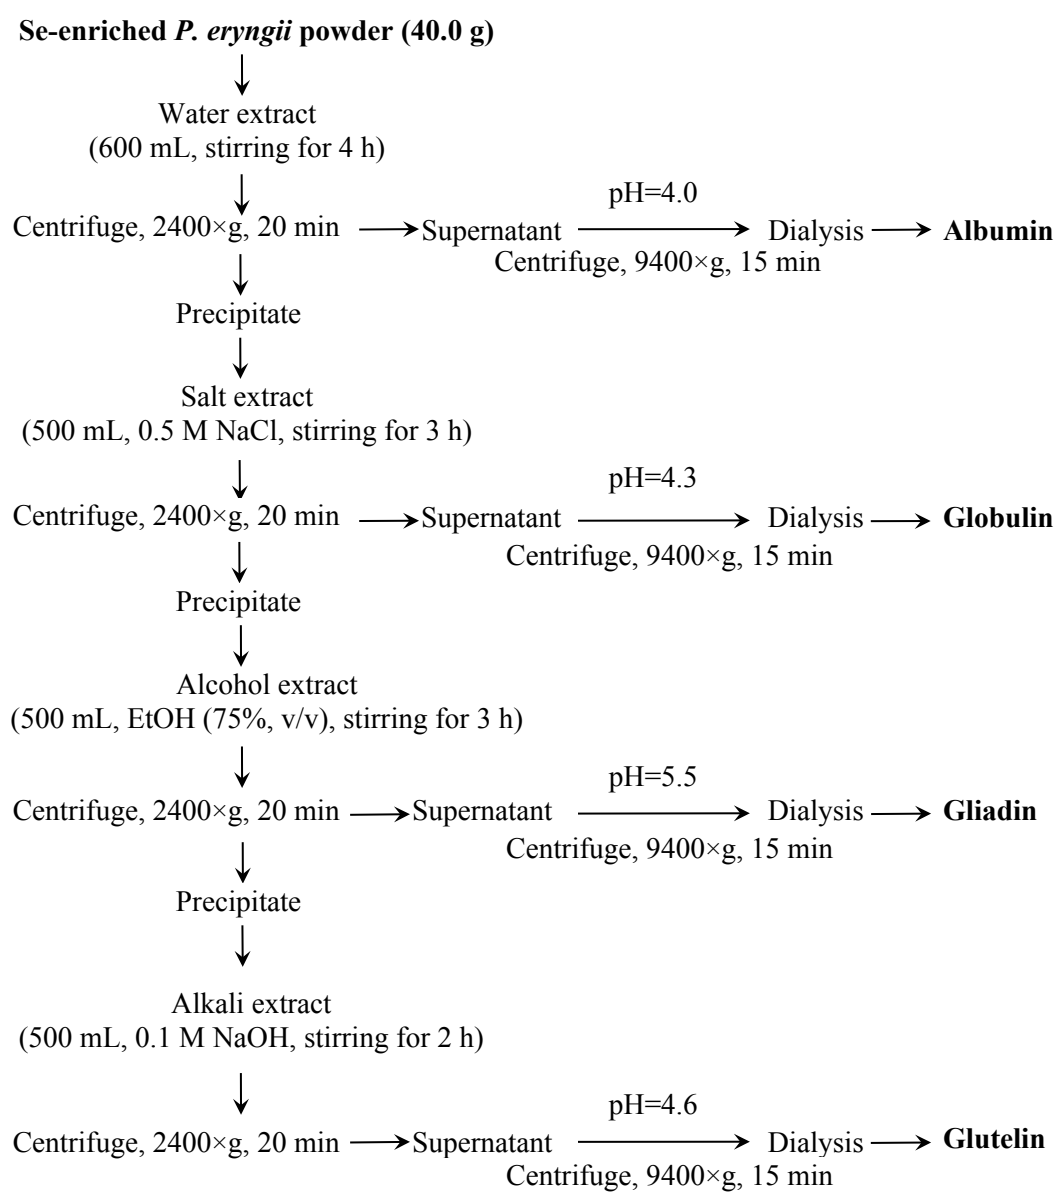

Supplement: c8fo00566d1.pdf [file c8fo00566d1.pdf]
